# Supplementary material
Source: MDPI journal article supplement (https://www.mdpi.com/2073-4395/13/7/1720)
Supplement: s1 [file s1]

## Article

# Absorption, translocation, and metabolism of glyphosate and imazethapyr in smooth pigweed with multiple resistance

Daniel Nalin <sup>1,\*</sup>, Gustavo Vinícios Munhoz-Garcia <sup>1</sup>, Ana Paula Werkhausen Witter <sup>2</sup>, Vanessa Takeshita <sup>1</sup>, Claudia de Oliveira <sup>3</sup>, Fernando Storniolo Adegas <sup>4</sup>, Valdemar Luiz Tornisielo <sup>1</sup>, Rubem Silvério de Oliveira Junior <sup>2</sup>, Jamil Constantin <sup>2</sup>.

<sup>1</sup> Center of Nuclear Energy in Agriculture, University of São Paulo, Av. Centenário 303; Piracicaba 13400-970, SP, Brazil

<sup>2</sup> Department of Agronomy, State University at Maringá, Av. Colombo, 5790; Maringá 87020-900, PR, Brazil

<sup>3</sup> Syngenta Crop Protection, Municipal HBR-333 Road, Holambra 13825-000, SP, Brazil

<sup>4</sup> Brazilian Agricultural Research Company, EMBRAPA, Carlos João Strass Road, Londrina 86085-981, PR, Brazil

\* Correspondence: danielnalin@usp.br

## Abstract:

The evolution of herbicide-resistance weeds is the major challenge for chemical management worldwide, increasing production costs and reducing yield. This work aimed to evaluate the putative resistance of the *Amaranthus hybridus* population from Candido Mota (CMT) to glyphosate and imazethapyr, and to investigate the non-target site mechanisms involved. Dose-response studies were conducted in greenhouse conditions and the control and biomass reduction were evaluated 28 days after the application (DAA). Absorption, translocation, and metabolism studies were evaluated at 72 hours after treatment (HAT), using radiometric techniques. Dose-response shows different responses among populations to glyphosate and imazethapyr. The CMT population was not controlled with labeled herbicide doses. Based on biomass reduction, the resistance factor was 16.4 and 9.4 to glyphosate and imazethapyr, respectively. The CMT absorbed 66% of <sup>14</sup>C-glyphosate and 23% of <sup>14</sup>C-imazethapyr at 72 HAT. Although the CMT population absorbed more glyphosate than the susceptible population (12.6%) the translocation was impaired for both herbicides in the CMT when compared to the SUS population. There was no evidence that herbicide metabolism was involved in CMT resistance to herbicides studied. Understanding the mechanisms endowing resistance allows better decision-making. This is the first study that describes non-target-site resistance mechanisms in an *Amaranthus hybridus* population from Brazil.

**Keywords:** Weed control, herbicide resistance, *Amaranthus hybridus*, EPSPs inhibitors; ALS inhibitors; non-target site resistance.

**Table S1.** Absorption of  $^{14}\text{C}$ -Glyphosate and  $^{14}\text{C}$ -Imazethapyr in SUS and CMT *Amaranthus hybridus* populations. \*Lowercase letters indicate differences between populations by Tukey's test ( $p < 0.05$ ).

| Herbicides  | Absorption <sup>a</sup> (%) |                |
|-------------|-----------------------------|----------------|
|             | Biotypes                    |                |
|             | CMT                         | SUS            |
| Glyphosate  | 66.79 ± 2.11 a              | 54.19 ± 6.97 a |
| Imazethapyr | 23.83 ± 4.79 b              | 51.06 ± 9.34 a |

<sup>a</sup>Calculated in relation of total applied.**Table S2.** Translocation of  $^{14}\text{C}$ -Glyphosate and  $^{14}\text{C}$ -Imazethapyr in SUS and CMT *Amaranthus hybridus* populations.

| Variables  |             | Translocation <sup>a</sup><br>(%) |
|------------|-------------|-----------------------------------|
| Biotypes   | CMT         | 43.85 ± 5.27 b                    |
|            | SUS         | 75.98 ± 1.09 a                    |
| Herbicides | Glyphosate  | 54.4 ± 11.36 ns                   |
|            | Imazethapyr | 65.43 ± 7.18 ns                   |

\*Lowercase letters indicate differences between treatments by Tukey's test ( $p < 0.05$ ). <sup>a</sup>Calculated in relation to total absorbed.**Table S3.** The metabolization of  $^{14}\text{C}$ -glyphosate in SUS and CMT *Amaranthus hybridus* populations.

| Population          | M1  |
|---------------------|-----|
| SUS                 | 0.3 |
| CMT                 | 0.3 |
| Analytical standard | 0.2 |

**Table S4.** Retention factor (Rf) to  $^{14}\text{C}$ -imazethapyr and metabolites in SUS and CMT *Amaranthus hybridus* populations.

| Population          | M1   | M2   | M3   |
|---------------------|------|------|------|
| SUS                 | 0.16 | 0.26 | 0.33 |
| CMT                 | 0.1  | 0.2  | 0.3  |
| Analytical standard |      | 0.4  |      |

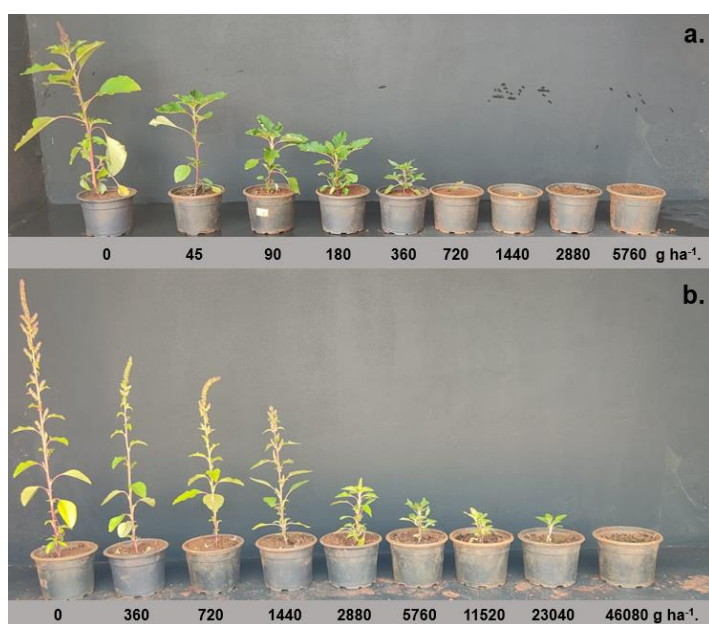

**Figure S1.** Evaluation of *A. hybridus* after 28 DAA of glyphosate, a) SUS and b) CMT population.

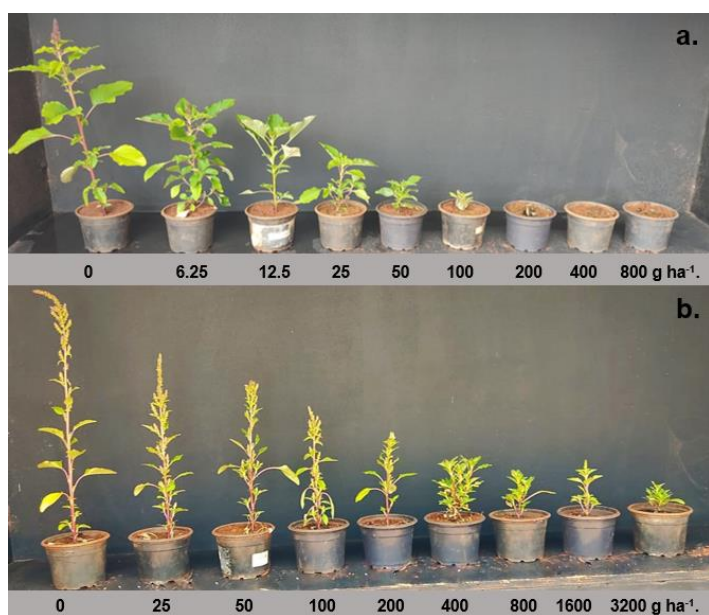

**Figure S2.** Evaluation of *A. hybridus* after 28 DAA of imazethapyr, a) SUS and b) CMT population.

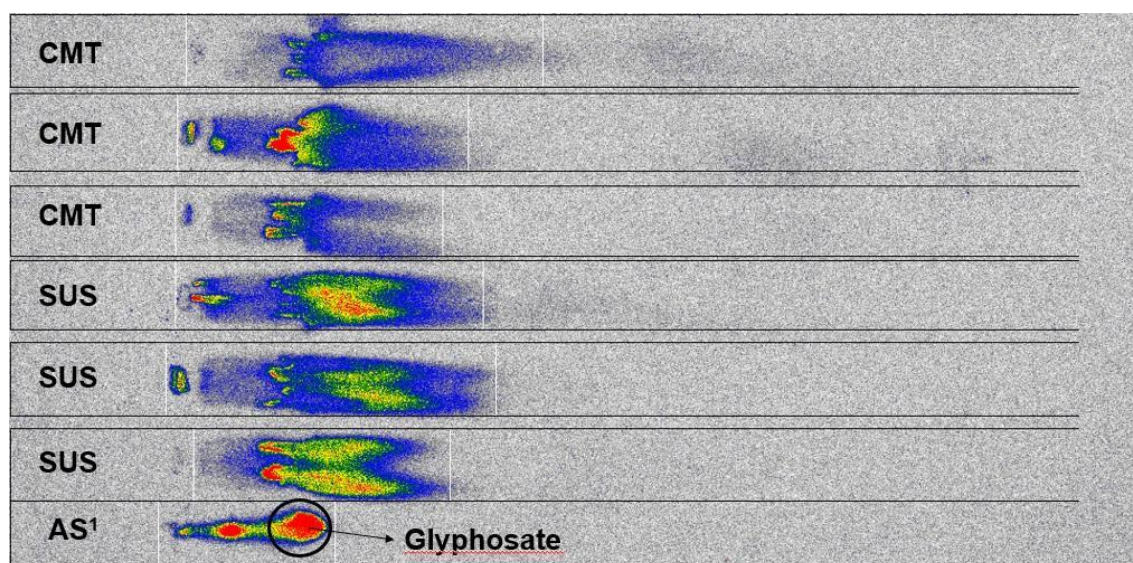

**Figure S3.** The metabolization of  $^{14}\text{C}$ -glyphosate in *A. hybridus* population at 72 HAT.

<sup>1</sup>Analytical standard

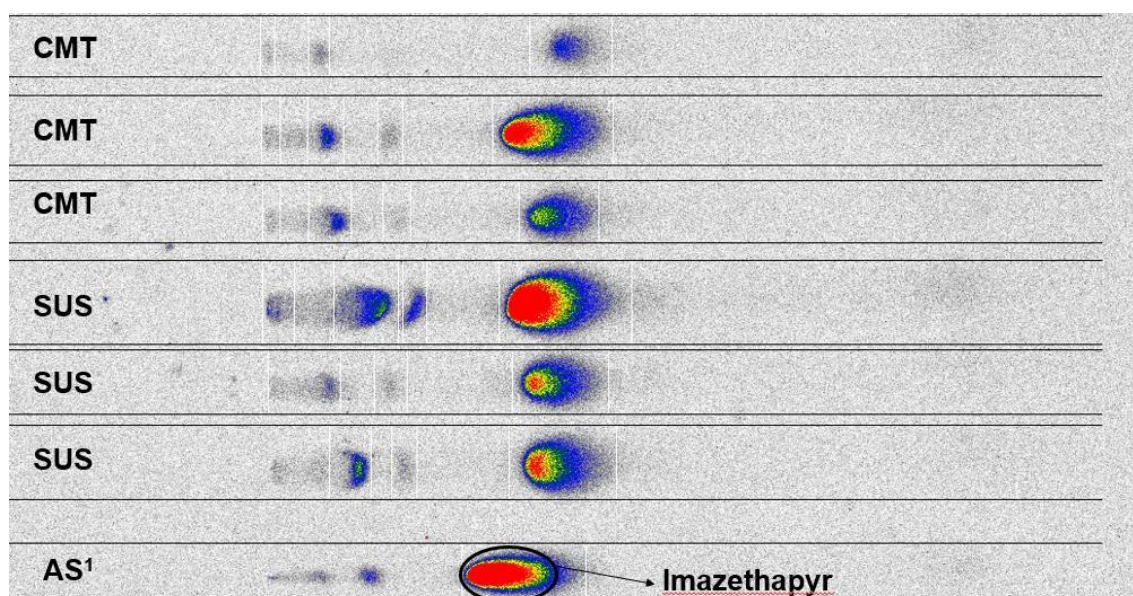

**Figure S4.** The metabolization of  $^{14}\text{C}$ -imazethapyr in *A. hybridus* population at 72 HAT.

<sup>1</sup>Analytical standard.
